# Supplementary material for: Double-layered protein nanoparticles conjugated with truncated flagellin induce improved mucosal and systemic immune responses in mice
Source: Royal Society of Chemistry journal article supplement (doi:10.1039/d4nh00287c), 2024-01-01
Supplement: d4nh00287c1.pdf [file d4nh00287c1.pdf]

## Supplementary Information

Fig.S1

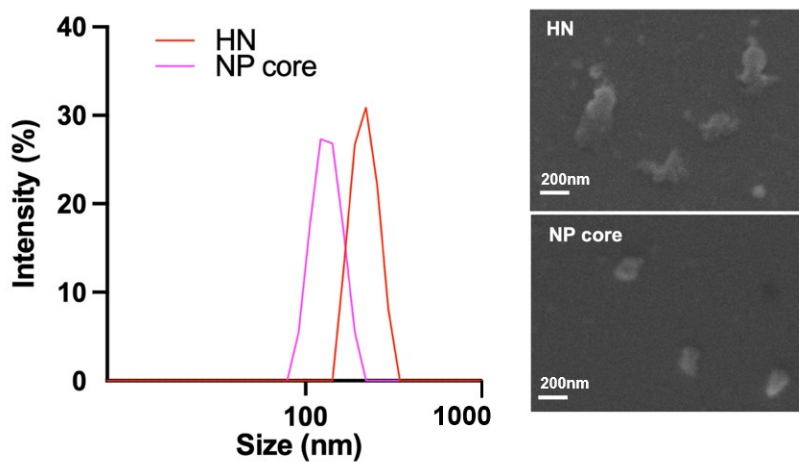

**Figure S1. Characterization of the NP core and HN Protein Nanoparticle.** Particle size distribution and SEM images of NP core and HN protein nanoparticles.

**Fig.S2**

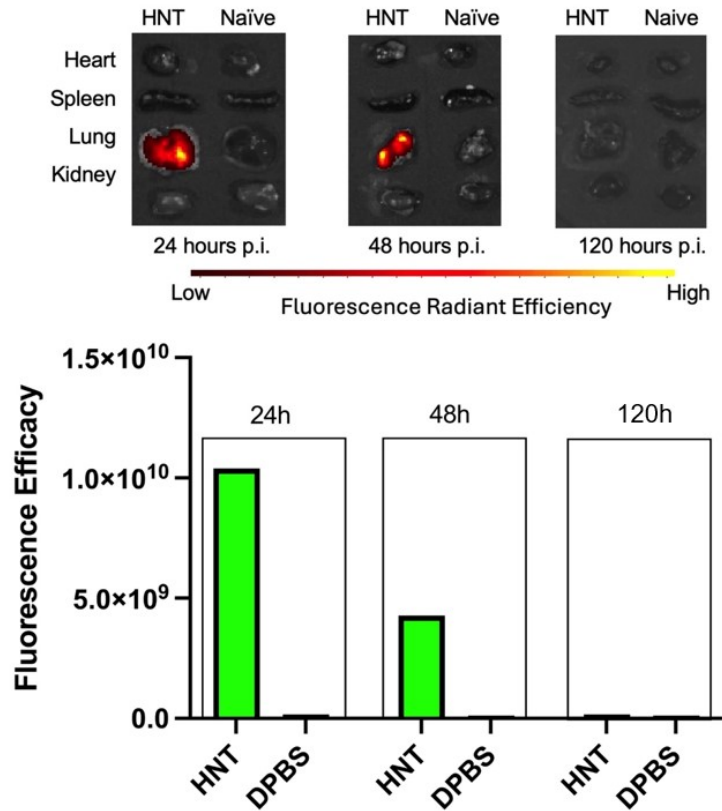

**Figure S2. Biodistribution of protein nanoparticles in mouse organs.** To study the distribution of intranasally administered fluorescent nanoparticles in mice, we used an in vivo imaging system (IVIS). Mice were sacrificed at 24-, 48-, and 120 hours post-administration, and organs (heart, lungs, kidneys, spleen) were collected for ex vivo imaging on Petri dishes. The Perkin-Elmer IVIS Spectrum system captured images, and Living Image software quantified the fluorescent intensity in the tissues.

Fig.S3

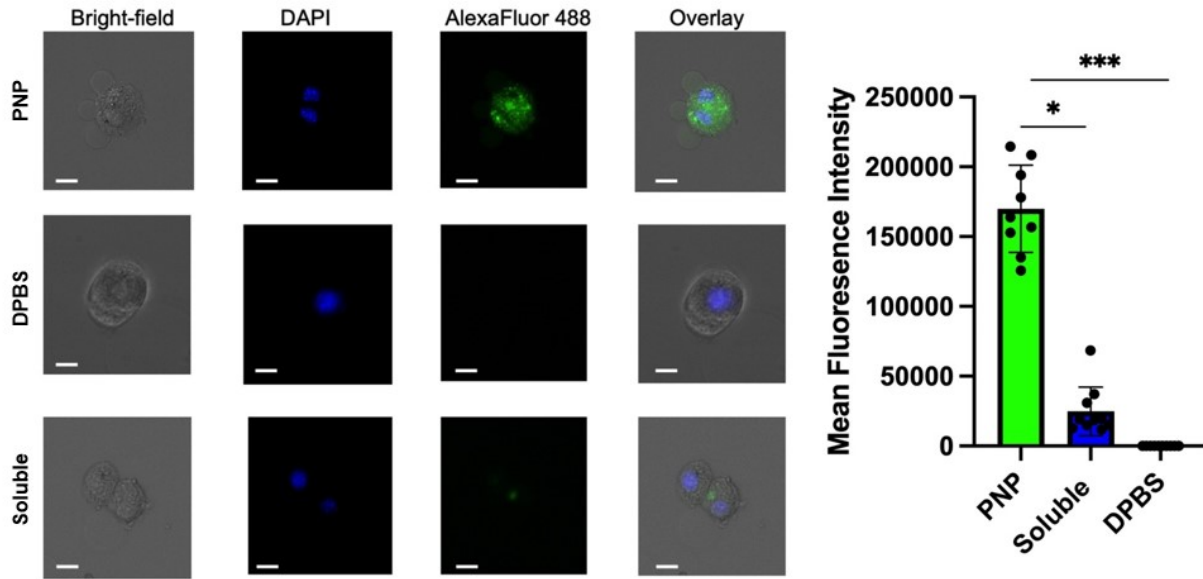

**Figure S3. The cellular uptake of protein nanoparticles in JAWSII cells.** JAWS II cells were exposed to Alexa Fluor 488 conjugated protein nanoparticles (PNP) or soluble HA3 protein (Soluble), respectively. DPBS was added as a control. After 24-hour incubation, the attached cells were stained with DAPI and observed under a fluorescent microscope (BZ-X710, Keyence) with 40x magnification (Scale bars, 10 $\mu$ m). The fluorescence intensity of Alexa Fluor 488 was quantitatively analyzed using the BZ-X analysis software (Keyence).

Fig.S4

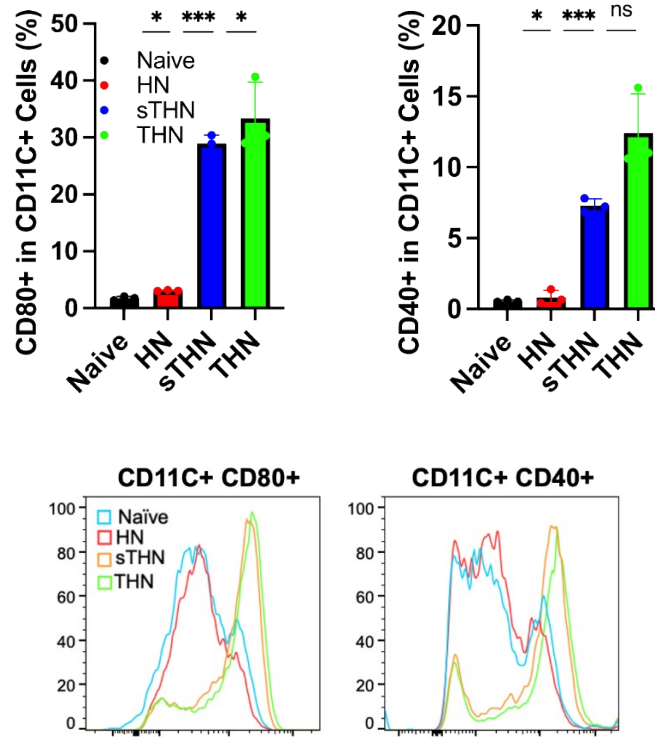

**Figure S4. The expression of maturation markers on BMDCs.** Cultured BMDCs were stimulated overnight with 4 $\mu$ g/ml of protein nanoparticles with and without tFliC adjuvant. The expression of CD80 and CD40 on CD11c+ BMDCs was determined by flow cytometry.

Fig.S5

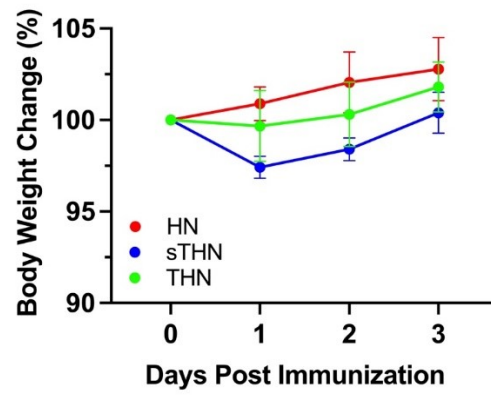

**Figure S5. Body weight changes post intranasal immunization.** Mice's body weights were monitored in the early days after intranasal immunization.

Fig.S6

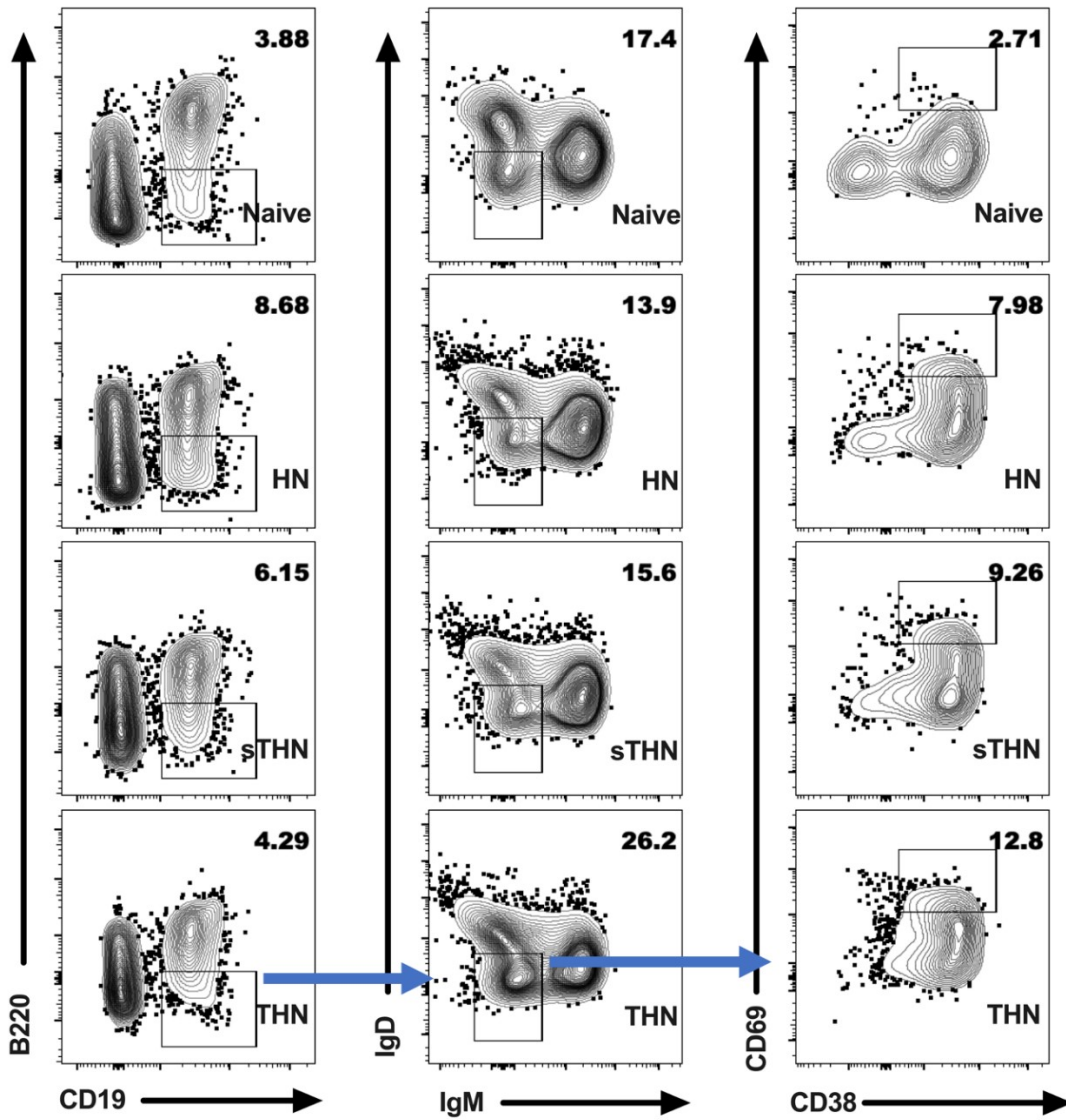

**Figure S6. The gating method for tissue-resident memory B cells in the lung.** Cells were isolated from lung tissues four weeks post-boosting immunization and stained for lung tissue-resident memory B cells, designated as CD19+B220-IgD-IgM-CD69+CD38+ populations.
